# Supplementary material for: Convergent Evolution of Mechanically Optimal Locomotion in Aquatic Invertebrates and Vertebrates
Source: PLoS Biol. 2015 Apr 28;13(4):e1002123. doi: 10.1371/journal.pbio.1002123 (PMC4412495; doi:10.1371/journal.pbio.1002123)
Supplement: S3 Data — (XLS) [file pbio.1002123.s003.xls]

## Sheet: Fig4-a
Height H = 3.6cm
Sp. Wavelength	Force (N)
9.7024	0.2622
12.9365	0.3435
13.8605	0.3693
15.5238	0.3879
17.6407	0.4073
19.4048	0.4205
25.873	0.4068
38.8095	0.3498
48.5119	0.2936
77.619	0.1591
Height H = 5cm
Sp. Wavelength	Force (N)
52.16	0.3228
32.6	0.7489
26.08	0.8322
17.3867	0.8371
13.04	0.7805
11.8545	0.7217
10.432	0.6155
9.3143	0.5712
8.6933	0.5146
6.52	0.3311

## Sheet: Fig4-b
Angle of excursion theta= 40deg
Sp. Wavelength	Force (N)
40.5733	0.3863
27.0489	0.7549
20.2866	0.8863
13.5244	0.8687
10.1433	0.7303
Angle of excursion theta= 30deg
Sp. Wavelength	Force (N)
52.16	0.2084
34.7733	0.4478
26.08	0.537
20.864	0.5396
17.3867	0.5206
13.04	0.4978
10.432	0.4215
8.6933	0.3388
Angle of excursion theta= 20deg
Sp. Wavelength	Force (N)
76.2528	0.0852
38.1264	0.219
25.4176	0.2431
19.0632	0.2478
15.2506	0.225
12.7088	0.2058

## Sheet: Fig4-c
Frequency = 1Hz
Sp. Wavelength	Force(N)
52.16	0.0535
34.7733	0.0653
26.08	0.0706
20.864	0.0699
17.3867	0.0719
13.04	0.0652
10.432	0.0519
8.6933	0.0437
Frequency = 2Hz
Sp. Wavelength	Force(N)
52.16	0.1241
34.7733	0.2352
26.08	0.2819
20.864	0.2874
17.3867	0.2785
13.04	0.2456
10.432	0.2067
8.6933	0.1792
Frequency = 3Hz
Sp. Wavelength	Force(N)
52.16	0.2084
34.7733	0.4478
26.08	0.537
20.864	0.5396
17.3867	0.5206
13.04	0.4978
10.432	0.4215
8.6933	0.3388

## Sheet: Fig4-d
Height = 0.4cm
Sp. Wavelegth	Force(micro N)
5	0.216
6.6667	0.33
10	0.56
13.3333	0.69
20	0.77
40	0.54
80	0.314
Height = 0.3cm
Sp. Wavelegth	Force(micro N)
39.801	0.187
20.0501	0.25
9.9875	0.1909
6.6667	0.12
5.0031	0.09
Height = 0.6cm
Sp. Wavelegth	Force(micro N)
40.404	2.732
20.202	3.332
10.0251	2.9
6.6667	1.757
5.0125	1.1

## Sheet: Fig4-e
Theta = 15deg
Sp. of Wave	Force(micro N)
38.637	0.1
19.3185	0.12
12.879	0.0978
9.6593	0.0835
7.7274	0.07
Theta = 30deg
Sp. of Wave	Force(micro N)
5	0.216
6.6667	0.33
10	0.56
13.3333	0.69
20	0.77
40	0.54
80	0.314
Theta = 45deg
Sp. of Wave	Force(micro N)
56.5685	1.224
28.2843	1.987
18.8562	2.37
9.4281	1.92
7.0711	1.36

## Sheet: Fig4-f
L = 3cm
Sp. Wavelength	Force(micro N)
40	0.879
20	1.2
10	0.86
6.6667	0.48
5	0.303
L = 2cm
Sp. Wavelength	Force(micro N)
5	0.216
6.6667	0.33
10	0.56
13.3333	0.69
20	0.77
40	0.54
80	0.314
L = 1cm
Sp. Wavelength	Force(micro N)
40	0.2
20	0.31
10	0.28
6.6667	0.185
5	0.1315
